# Supplementary material
Source: PubMed Central journal article supplement (PMC1904301)
Supplement: JCI0727523sd.pdf [file JCI0727523sd.pdf]

***Murine LC3 as a marker of autophagy***

Recently, intracellular processing of rat LC3 has emerged as a reliable marker of autophagic activity (1). To ensure that murine LC3 is targeted similarly, we performed double-labeling immunofluorescence studies to track murine LC3 (mLC3) and GFP-fused rat LC3 (rLC3). C2C12 skeletal myoblasts and neonatal rat cardiomyocytes (NRVM) transfected with constructs expressing GFP-mLC3 manifested diffuse, cytoplasmic GFP fluorescence under nutrient-rich conditions. Following amino acid deprivation, an established trigger of autophagy, myc-tagged mLC3 localized as punctate aggregates, which overlapped with GFP-rLC3 (**Figure 1 Online Data Supplement**).

To track the processing of endogenous LC3, we generated an affinity-purified, rabbit polyclonal anti-LC3 antibody. This antibody detected both the unprocessed (LC3-I) and processed (LC3-II) isoforms in cultured NRVMs. Both amino acid deprivation and exposure to hypoxic conditions triggered processing of endogenous LC3 (**Figures 1-2 Online Data Supplement**).

To test for cardiac autophagy *in vivo*, mice were fasted for 48h. Throughout this time, animals had free access to water, and they manifested no signs of distress. Short-term nutrient deprivation, an established trigger for autophagy in numerous tissues including heart (1-3), induced dramatic and progressive increases in LC3-II in left ventricular (LV) lysates, indicative of increased autophagic activity (**Figure 3A Online Data Supplement**).

Ultrastructural studies were performed in heart to probe for double membrane-bound autophagic vacuoles, a long-established analytical “gold standard” for autophagy. Following short-term nutrient deprivation, significant numbers of both early (containing morphologically intact cytoplasm) and late (containing partially degraded but identifiable cytoplasmic material) (4) autophagosomes and autolysosomes were detected in cardiac myocytes (**Figure 3B Online Data Supplement**). Together, these data demonstrate that cardiac myocyte autophagy is triggered by stress *in vitro* and *in vivo*, consistent with prior studies (5), and they establish mLC3 processing and translocation as *bona fide* markers of autophagic activity in cardiac muscle.

**Table I: Online Data Supplement**

|                                            | Sham      |                     |                                              | sTAB      |                     |                                              |
|--------------------------------------------|-----------|---------------------|----------------------------------------------|-----------|---------------------|----------------------------------------------|
|                                            | WT        | <i>αMHC-GFP-LC3</i> | <i>αMHC-GFP-LC3 x beclin 1<sup>+/-</sup></i> | WT        | <i>αMHC-GFP-LC3</i> | <i>αMHC-GFP-LC3 x beclin 1<sup>+/-</sup></i> |
| <b>Echocardiographic Data</b>              |           |                     |                                              |           |                     |                                              |
| Heart rate                                 | 612±27    | 690±33              | 640±35                                       | 617±57    | 585±30              | 600±49                                       |
| LVEDD (mm)                                 | 1.72±0.04 | 1.90±0.11           | 1.90±0.20                                    | 3.2±0.2*  | 3.2±1.0*            | 2.5±0.5*                                     |
| LVESD (mm)                                 | 0.43±0.08 | 0.51±0.08           | 0.50±0.12                                    | 2.2±0.07* | 2.1±0.9*            | 1.4±0.6**                                    |
| %FS                                        | 75±6      | 73±3                | 74±4                                         | 30±2*     | 31±2*               | 44±4**                                       |
| n (animals)                                | 4         | 6                   | 3                                            | 4         | 5                   | 4                                            |
| <b>Morphometric and Physiological Data</b> |           |                     |                                              |           |                     |                                              |
| BW (g)                                     | 25.5±1.3  | 24.8±0.46           | 26.1±0.9                                     | 24.1±2.0  | 23.6±1.5            | 23.8±1.8                                     |
| HW/BW                                      | 4.9±0.3   | 5.2±0.1             | 4.7±0.1                                      | 9.3±1.2*  | 9.2±1.7*            | 9.9±1.6*                                     |
| LW (mg)                                    | 154±11    | 144±10              | 154±14                                       | 420±80*   | 450±38*             | 477±39*                                      |
| SBP (mmHg)                                 | 136±8     | 134±16              | 131±4                                        | N/A       | N/A                 | N/A                                          |
| n (animals)                                | 7         | 6                   | 3                                            | 5         | 5                   | 4                                            |

N/A: not available

\* denotes p&lt;0.05 vs WT Sham

\*\* denotes p&lt;0.05 vs WT sTAB

1. Mizushima, N., Yamamoto, A., Matsui, M., Yoshimori, T., and Ohsumi, Y. 2004. In vivo analysis of autophagy in response to nutrient starvation using transgenic mice expressing a fluorescent autophagosome marker. *Mol Biol Cell* 15:1101-1111.
2. Kuma, A., Hatano, M., Matsui, M., Yamamoto, A., Nakaya, H., Yoshimori, T., Ohsumi, Y., Tokuhiya, T., and Mizushima, N. 2004. The role of autophagy during the early neonatal starvation period. *Nature* 432:1032-1036.
3. Pattingre, S., Tassa, A., Qu, X., Garuti, R., Liang, X.H., Mizushima, N., Packer, M., Schneider, M.D., and Levine, B. 2005. Bcl-2 antiapoptotic proteins inhibit beclin-1-dependent autophagy. *Cell* 122:927-933.
4. Kostin, S., Pool, L., Elsasser, A., Hein, S., Drexler, H.C., Arnon, E., Hayakawa, Y., Zimmermann, R., Bauer, E., Klovekorn, W.P., et al. 2003. Myocytes die by multiple mechanisms in failing human hearts. *Circ Res* 92:715-724.
5. Klionsky, D.J., and Emr, S.D. 2000. Autophagy as a regulated pathway of cellular degradation. *Science* 290:1717-1721.

## Figure Legends

### **Figure 1 Online Data Supplement. LC3 processing in C2C12 myoblasts and neonatal cardiomyocytes.**

**Panel A.** C2C12 cells were co-transfected with GFP-rLC3 and myc-mLC3 and nutrient-deprived for 2 hours. **Left:** GFP signal from tagged rat LC3 aggregates in a punctate pattern, indicative of autophagy. **Middle:** The same cell was labeled by anti-myc primary antibody and cy3-conjugated secondary antibody to detect transfected mLC3. **Right:** Overlay of GFP (rLC3) and cy3 (mLC3) signals demonstrate co-localization of the 2 proteins. Scale bar: 8  $\mu$ m. **Panel B:** In cultured NRVMs, short-term hypoxia triggered LC3 processing from the cytosolic 18kD LC3-I form to the membrane-bound 16kD LC3-II form. Similar LC3 processing, indicative of increased autophagic activity, was detected in cultured C2C12 skeletal myoblasts (**Panel C**) and NRVM (**Panel D**) subjected to short-term amino acid deprivation (starvation).

### **Figure 2 Online Data Supplement. Starvation-induced LC3 processing in NRVM.**

We developed an affinity-purified polyclonal mouse LC3 antibody. Using this reagent, discrete bands at 18kD and 16kD were detected whose relative abundance shifted with short-term starvation (an established trigger of autophagy), consistent with LC3-I and LC3-II respectively. Depicted here is the entire blot, including LC3-I, LC3-II, and several nonspecific bands.

### **Figure 3 Online Data Supplement. Starvation-induced cardiomyocyte autophagy *in vivo*.**

**Panel A.** Immunoblot analysis using affinity-purified anti-LC3 reveals an increase in the ratio of processed LC3-II to LC3-I in ventricular lysates isolated from 24h-starved mice compared with control. Mean data from 3 independent experiments. \* denotes  $p < 0.05$  **Panel B.** Ultrastructural features of autophagy are apparent in ventricular cardiomyocytes from 48h-starved mice, including multilamellar vacuoles harboring intracellular contents. Scale bar: 120 nm.

### **Figure 4 Online Data Supplement. Increased afterload hemodynamic stress, and associated heart failure, does not trigger autophagy in non-cardiac tissues.**

Representative immunoblots for LC3 from liver (**Panel A**), kidney (**Panel B**), and brain (**Panel C**) demonstrating that LC3-II/LC3 I ratio is not significantly increased in these tissues following sTAB.

**Figure 5 Online Data Supplement: Induction of lysosomal markers was less in *beclin 1*<sup>+/-</sup> hearts subjected sTAB relative to wild type.**

Cathepsin D and LAMP 1 were detected by immunohistochemistry in sTAB ventricle. The abundance of both lysosomal markers was less in *beclin 1*<sup>+/-</sup> LV post-sTAB (48h) relative to wild type LV post-sTAB. Scale bar: 40  $\mu$ m.

**Figure 6 Online Data Supplement. sTAB-induced pressure-overload heart failure is not associated with declines in body weight.**

To test for possible decreases in food intake in heart failure mice, body weight was tracked for 48 hours and compared with animals subjected to short-term food deprivation. Filled squares: sTAB; Open squares: starvation. N=3 in each group.

**Figure 7 Online Data Supplement. Fetal gene activation.**

RNA dot blots (**Panel A**) reveal increased abundance of ANF mRNA in TAB LV from both WT and Beclin 1 TG hearts. **Panel B**: Mean data quantified from 3 independent experiments.

\* denotes  $p < 0.05$  compared with Sham

**Supplementary Figure to consider for journal cover. Pressure overload-induced hypertrophy is amplified in Beclin 1 transgenic hearts.**

Representative images of hearts from WT and *beclin 1* TG hearts treated as listed. Scale bar: 1 mm.

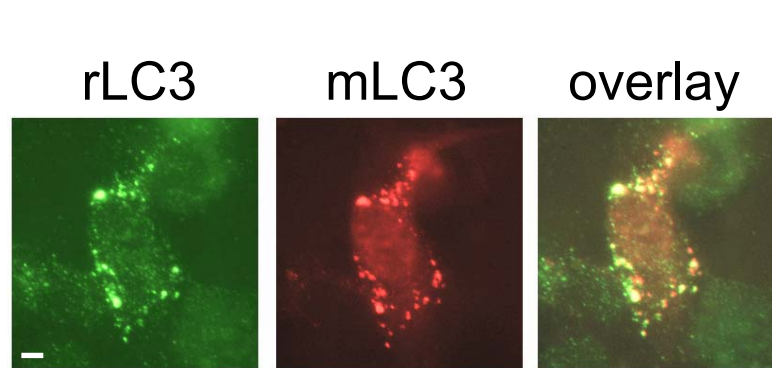

A

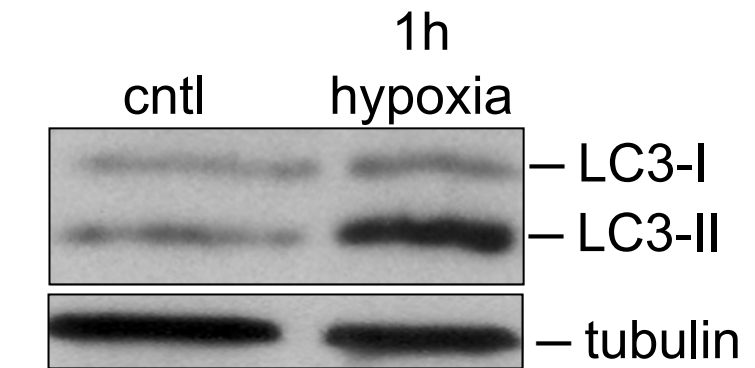

B

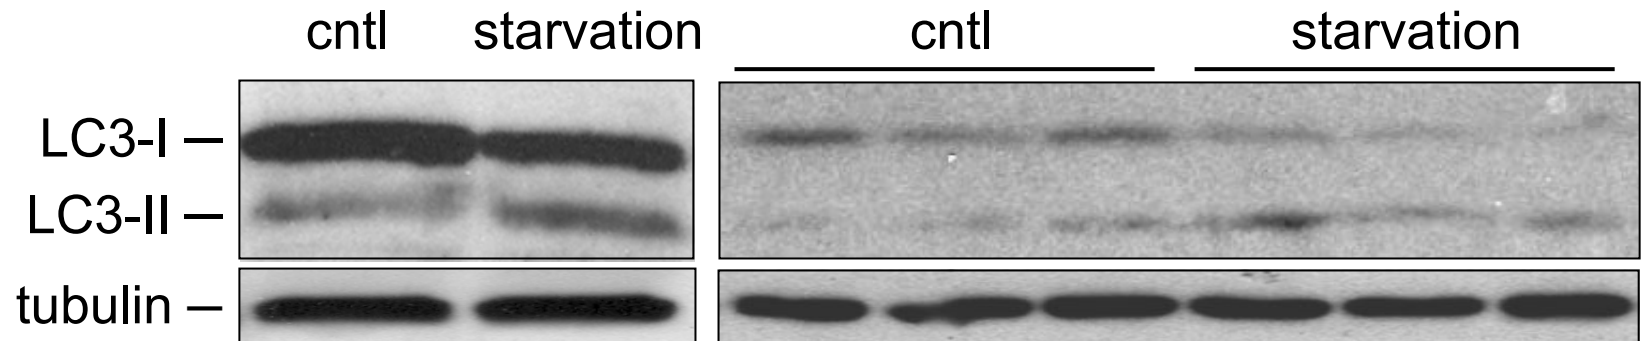

C

D

**Figure 1 Online Data Supplement**

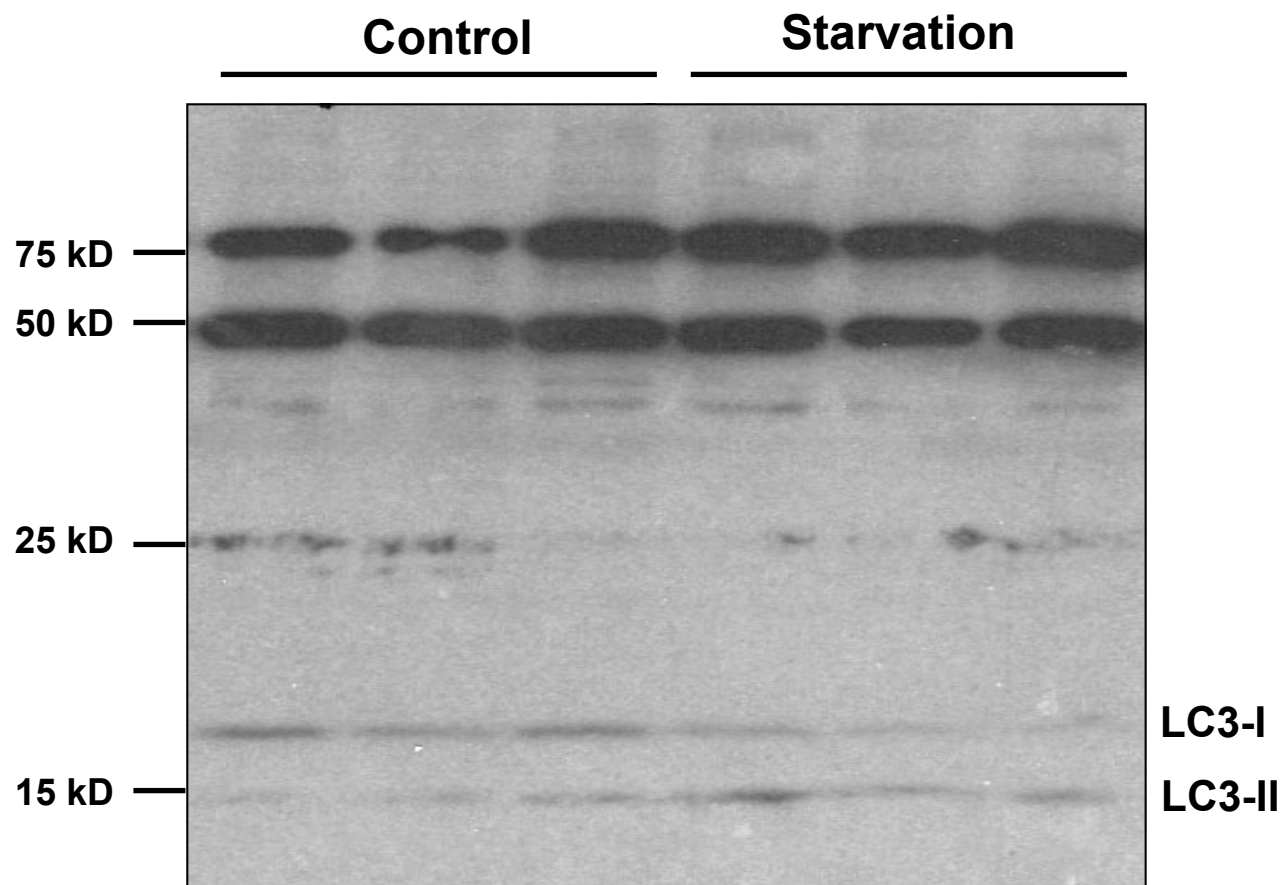

**Figure 2 Online Data Supplement**

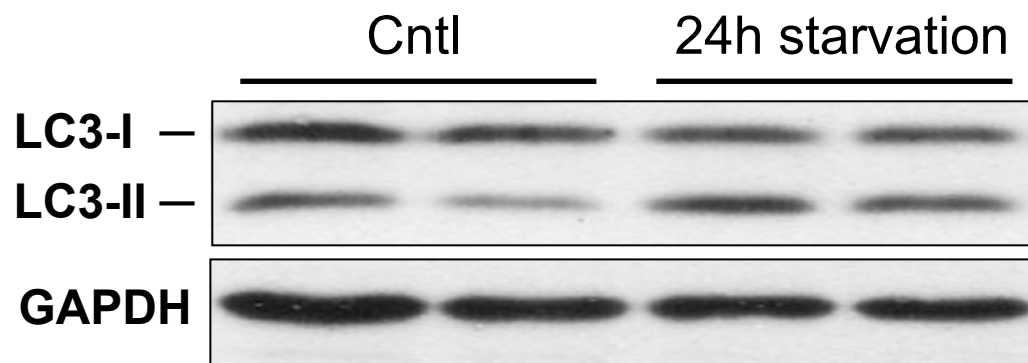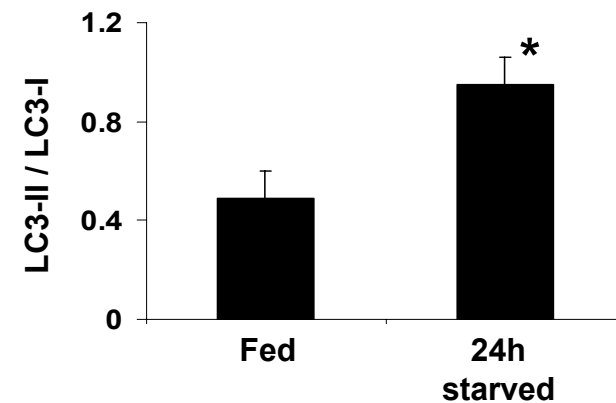

A

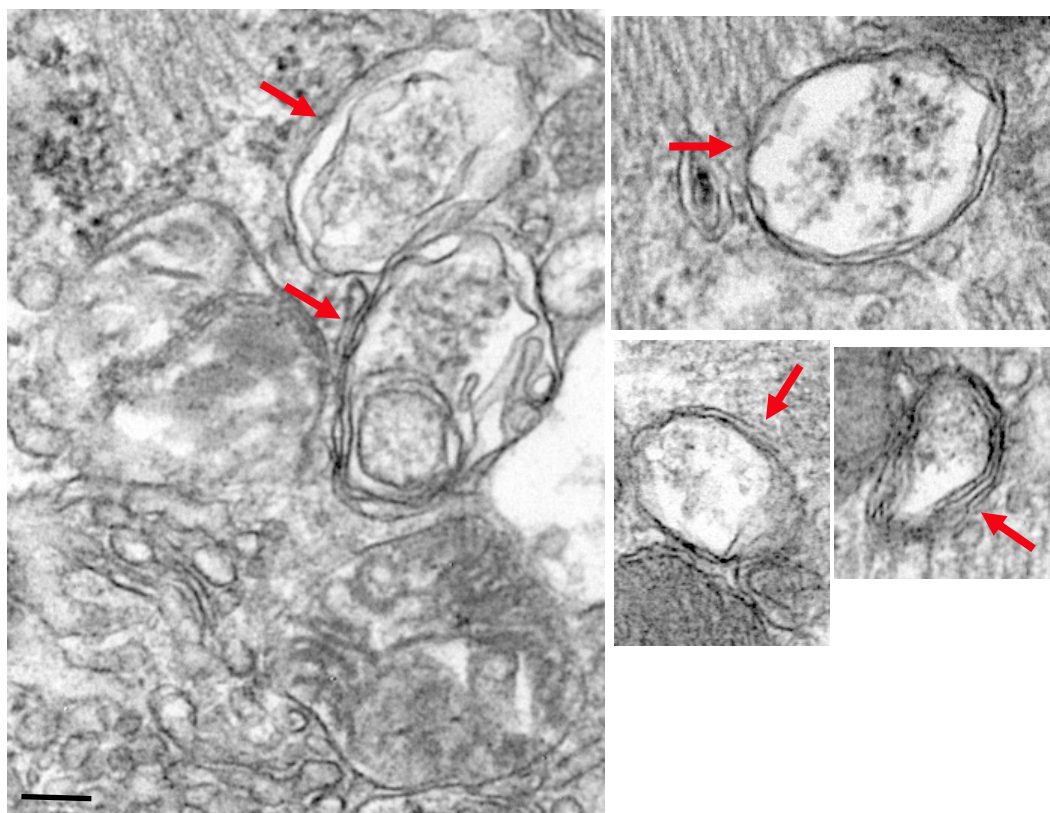

B

Figure 3 Online Data Supplement

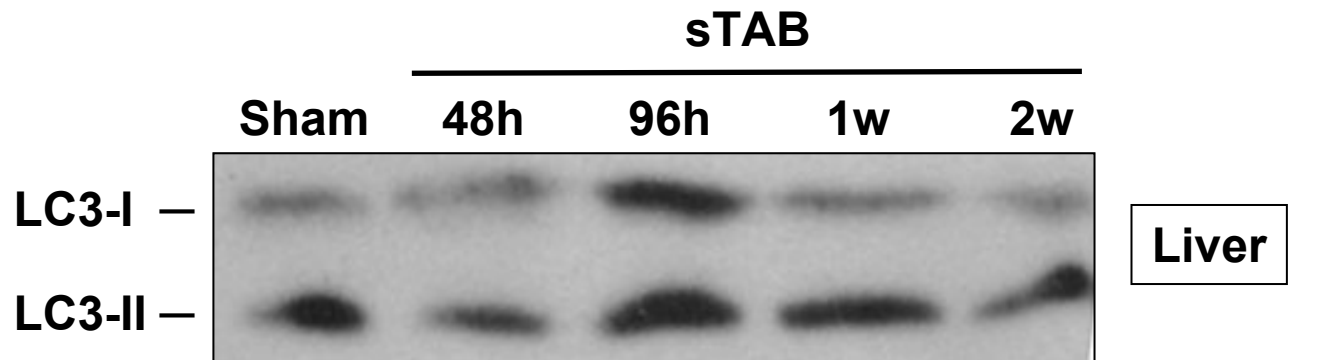

**A**

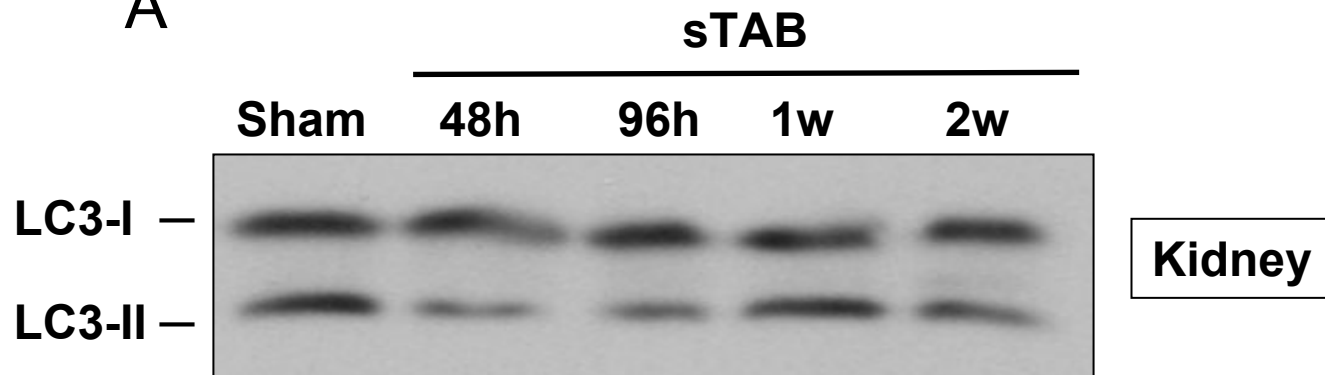

**B**

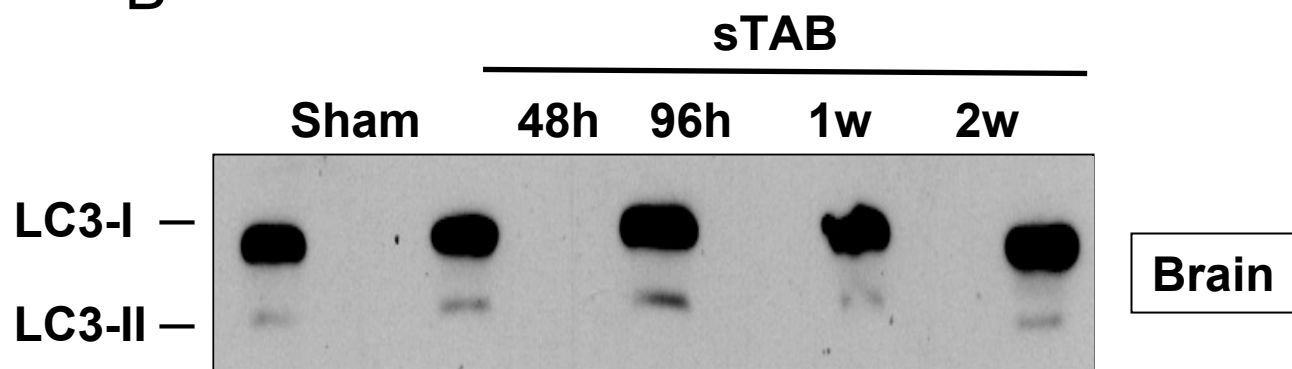

**C**

**Figure 4 Online Data Supplement**

**WT**

**beclin 1<sup>+/-</sup>**

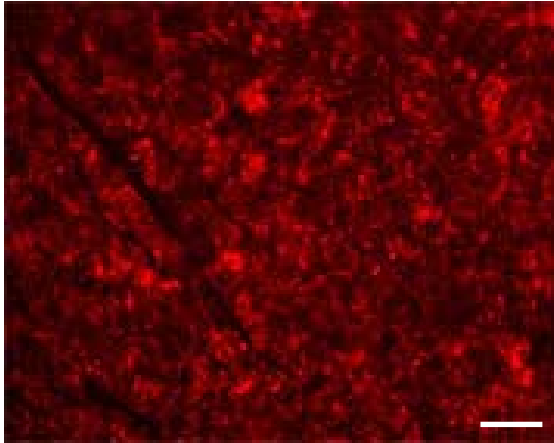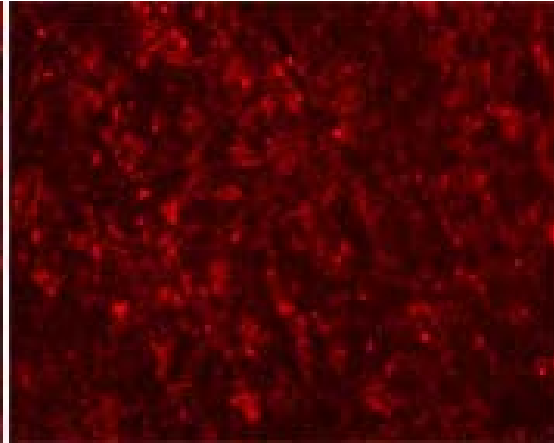

**Cathepsin D**

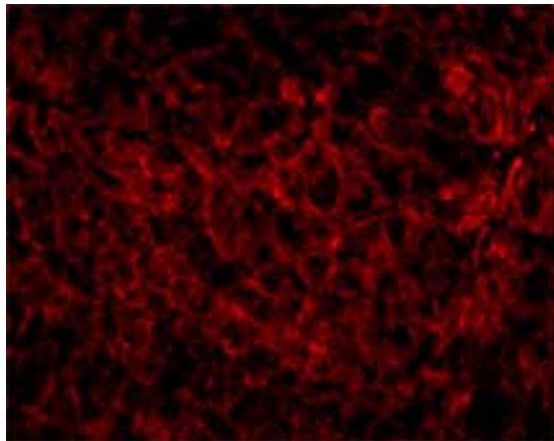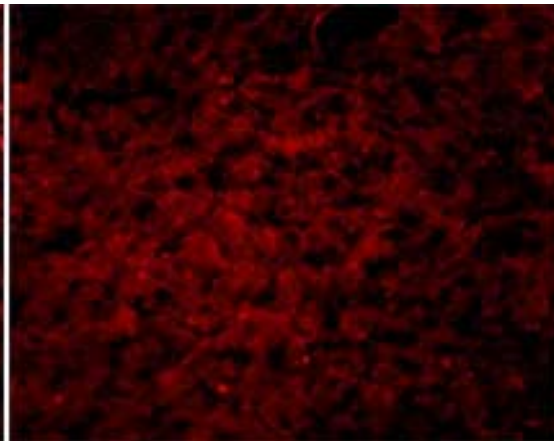

**LAMP 1**

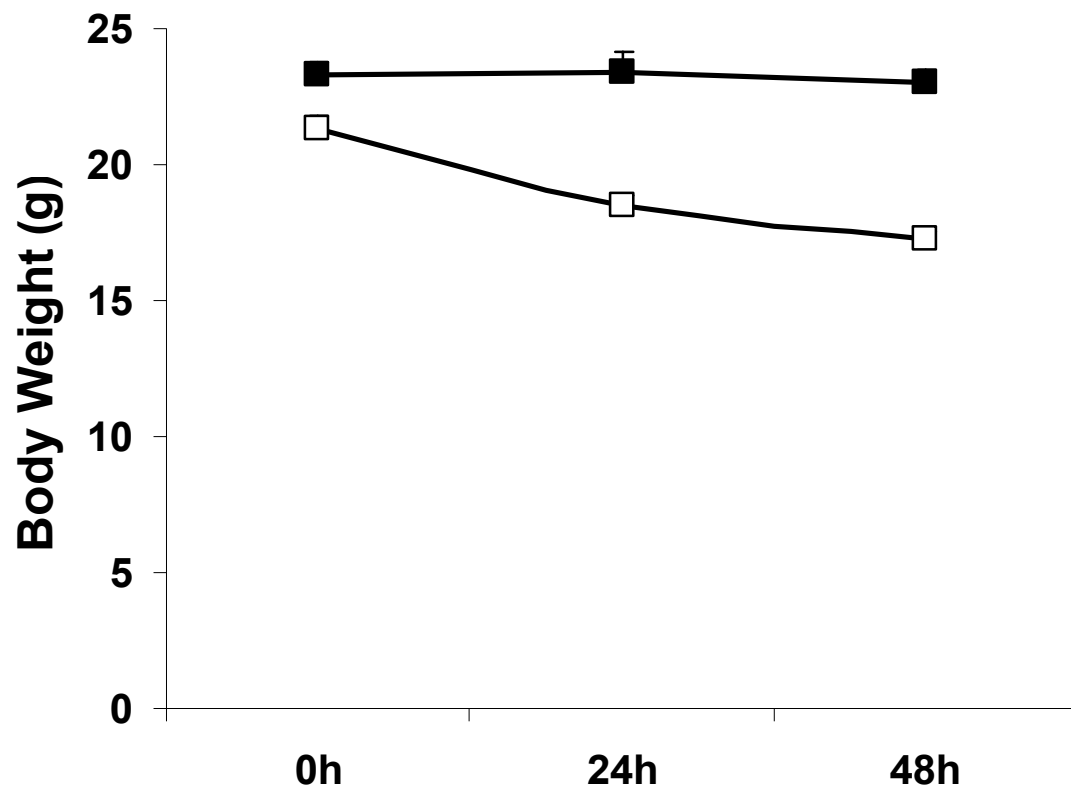

**Figure 6 Online Data Supplement**

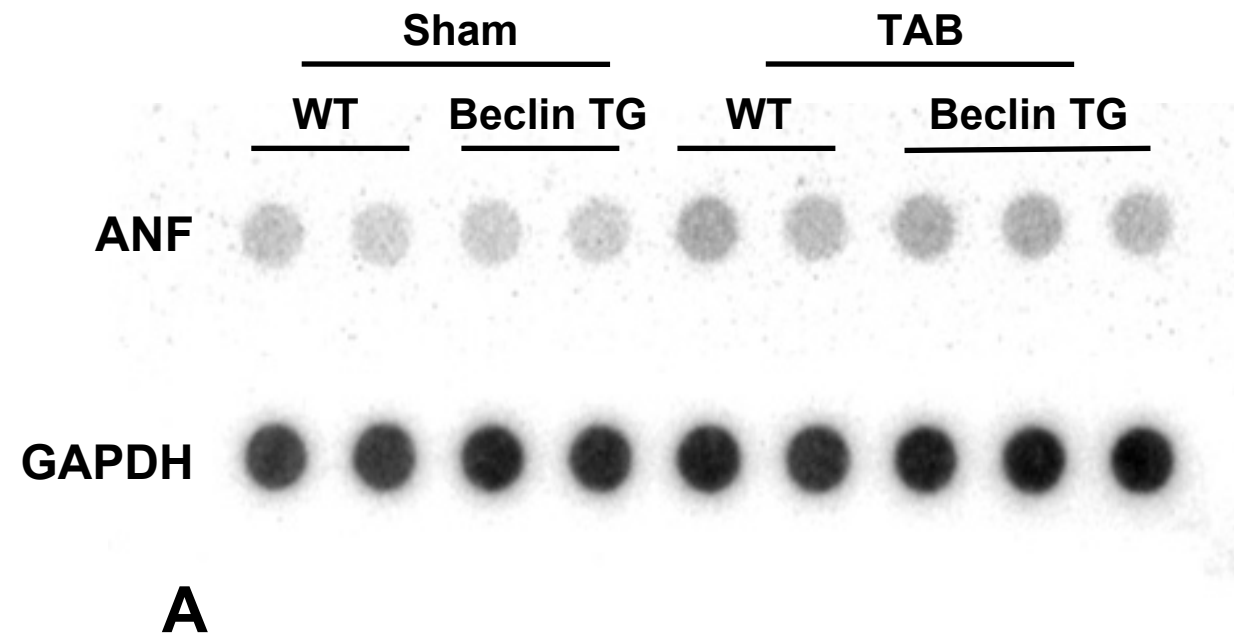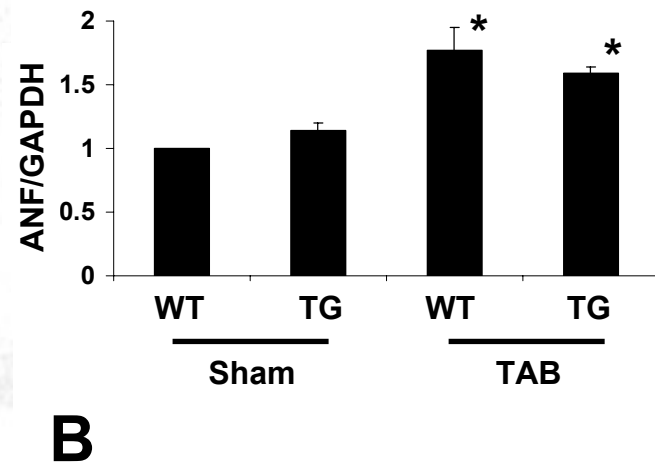

Figure 7 Online Data Supplement
